# Supplementary material for: Key factors for promoting protective behaviours in future pandemics: An umbrella review
Source: Research Square preprint supplement (doi:10.21203/rs.3.rs-8405099/v1), 2026-01-07
Supplement: Supplementary file 2 [file 642ff2b42bafa3c114835233.docx]

Search Strategy

Databases: Pubmed, Scopus

- Search run 30/11/2023

Pubmed

Query: "COVID-19"[Title/Abstract] AND "PROTECTIVE BEHAVIO*"[Title/Abstract] AND (meta-analysis[Filter] OR review[Filter] OR systematicreview[Filter])

Results: 24

Scopus

Query: (TITLE-ABS-KEY(covid-19) AND TITLE-ABS-KEY("protective behavio*")) AND ( LIMIT-TO ( DOCTYPE,"re" ) )

Results: 24

Duplicates: 15

- Search update 31/03/2024

Pubmed Results: 4

Scopus Results: 3

Duplicate: 2

- Search update 30/06/2025

Pubmed Results: 4

Scopus Results: 4

Epistemonikos

Query: “(title:COVID-19 OR abstract:COVID-19) AND ((title:"protective behavior" OR abstract:"protective behavior") OR (title:"protective behaviour" OR abstract:"protective behaviour") OR (title:"protective behaviors" OR abstract:"protective behaviors") OR (title:"protective behaviours" OR abstract:"protective behaviours"))”

Filter: Publication type: “Systematic Review”

Results: 23

Duplicate: 16
