# Supplementary material for: Key factors for promoting protective behaviours in future pandemics: An umbrella review
Source: Research Square preprint supplement (doi:10.21203/rs.3.rs-8405099/v1), 2026-01-07
Supplement: Supplementary file 4 [file a3893de44806b22b1956f755.xlsx]

## Sheet: Data_Extracted
Id	Nom (date)	Pandemic-Epidemic	Population/Sample	Method	Theoretical framework	Objective	Enabling Factors (Results)	Blocking Factors (Results)	Factors reported as having no effects	Protective Behaviours	Review Quality and Risk of Bias Assessments
1	Berg et al. (2021)	H1N1, COVID-19 (response phase), influenza	48 papers (peer reviewed; qualitative, quantitative): 33 COVID, 12 H1N1, 3 pandemic influenza Countries: Australia, Canada, China, England, Europe, Germany, Hong Kong, Israel, Italy, Japan, Kuwait, Multiple, Norway, Saudi Arabia, Slovakia, Slovenia, South Africa, South Korea, Singapore, Sweden, United Kingdom, USA	Rapid Scoping Review-(Prisma-ScR) Medline and Embase Language: EN Terms: health, risk, mass, crisis, or media communication, communication methods, modes of communication, sources of communication, and H1N1, COVID-19 and/or pandemic. January 2009 through October 2020.	Not relevant	to synthesise the existing evidence regarding different modes of communication used by health authorities in health risk communication with the public during a pandemic: i) communication channels, ii) source credibility (why), iii) how the message is communicated	(1) Trust in formal (governmental) sources (ii) Liao et al., 2010; Hong Kong, H1N1) (3) Trust in formal spokespersons: health care professionals’ written persuasive messages were more effective than messages from the governor, patients or a public health expert or a control message (ii) Okuhara et al, 2020; Japan, COVID-19) . (6) Multimodal communication (raw numbers + graphs) to understand the e…	(2) Lack of trust in (governmental) sources spread of misinformation related to the effect of a Chinese herb on COVID-19 prevention in official media, shared by social medias with titles inconsitent to the facts (ii) Zhang et al, 2020a; China, COVID-19) . (4) Lack of trust in formal spokespersons (perception that officials had concealed information about the COVID-19 oubreak in Wuhan, which reduc…		(1) Hand hygiene (2) Rumours and hoarding behaviour (3) Isolation (stay home) (4) Information from unofficial sources, conspiracy theories and rumours (5) Vaccination (6) Compliance with the WHO's COVID 19 recommendations (by affecting risk perception)	PRISMA flow diagram No method of risk of bias assessment reported
2	Brony et al. (2024)	COVID-19	13 papers (peer-reviewed, conference papers, case studies): 13 COVID-19 Country: India	Systematic review (PRISMA) CINAHL, Google Scholar, PubMed, WHO Global Index Medicus Language: EN Terms: variations of "COVID,” “COVID-19,” “coronavirus,” “social media,” “SNS” (social networking sites), “India,” and specific stakeholders such as “government,” “journalist,” “healthcare professional,”, “health organization.” December 2019 through January 2024	Not relevant	to analyze the use of social media by health communicators and to identify its advantages and challenges	Social media utilization by health communicators			Protective behaviours Information (e.g., safety protocols, social support)	PRISMA flow diagram No method of risk of bias assessment reported
3	Hall et al. (2022)	Seasonal influenza	78 papers (peer reviewed, registered grey literature; qualitative, (prospective)cross-sectional, (prospective) cohort, pre- and post- quasi-experimental interventional): 78 COVID-19 Specific population: Healthcare personnel Countries: Australia, Belgium, Canada, China, Dubai, France, Germany, Hong Kong, Iran, Ireland, Israel, Italy, Japan, Malaysia, Morocco, Multiple, Qatar, Saudi Arabia, Singapo…	Integrative review (Prisma) Cochrane Library, Prospero, Joanna Briggs Institute, CINAHL, PsycINFO, Medline, LILACS, Embase, Scopus, Google Scholar, ProQuest Dissertations and Theses A&I, ClinicalTrials.com Laguage: EN Terms: influenza vaccination (e.g., immun*, vaccin*, flu/influenza vaccine, pandemic, seasonal, influenza/flu, viral respiratory infection), vaccine hesitancy (e.g., hesitancy, dete…	Health behaviour change models	to explore the determinants of seasonal influenza vaccination compliance among healthcare workers, to provide recommendation for policy and research, to identify models to predict and promote protective behaviours	(1a) Perception of vulnerability (high; Lim et al., 2017; Singapore) (2a) Trust in the vaccine (AlMarzooqi et al. 2018; Dubai) (3) Professional/moral duty (sense of responsibility towards others; Edge et al., 2017; Looijmans-van den Akker et al., 2009; The Netherlands; Wilson et al., 2019; France) (4) Awareness of vaccination recommendations (Clarke et al., 2009; USA) (5a) Knowledge and experienc…	(1b) Perception of vulnerability (weak; AlMarzooqi et al., 2018; Dubai; Askarian et al., 2011; Iran; Bonaccorsi et al., 2013; Italy; Johansen et al., 2011; USA; Lim et al., 2017; Singapore; Učakar, & Kraigher, 2019; Slovenia; Ward et al., 2011; Zhang et al., 2011; United Kingdom) (2b) Mistrust of the vaccine (Kyaw et al., 2019; Singapore; Tagajdid et al., 2011; Morocco) (5b) Poor knowledge (of th…	(5c) Vaccination education alone (Johansen et al., 2011; USA; Wilson et al., 2019; France)	Vaccination	PRISMA flow diagram and 27-item checklist Public Health Ontario Meta QAT tool No method of risk of bias assessment reported
4	Majid et al. (2021)	Pandemics, epidemics and global outbreaks in the 21st century: COVID-19, Ebola, H1N1, SARS, MERS	41 papers (qualitative, cross-sectional, prospective cohort, mixed methods): 23 COVID-19, 7 Ebola, 6 H1N1, 3 SARS, 2 MERS Countries: Australia, China, Hong Kong, Israel, Italy, Kuwait, Liberia, Malaysia, Multiple, Nigeria, Norway, Poland, Romania, Saudi Arabia, Sierra Leone, Singapore, South Korea, Sweden, Switzerland, Taiwan, Uganda, USA	Systematic review (PRISMA) and thematic analysis Medline, Embase, PsychInfo, Global Health Language: Not Specified Terms (search strategy in supplementary material): Infection (e.g., SARS, coronavirus, zika, ebola, influenza, H1N1, etc.), outbreak (epidemics, outbreaks, pandemics, contagion, containment, quarantine, communicable disease control, spread, infection, etc.), reactions (knwoledge, sti…	Not relevant	to identify the relationship between (mis)trust in government, media and health care providers, and acceptance and maintenance of public health recommendations	Trust in government (1a) Chan et al., 2020; Multiple, COVID-19 (2) Higher levels of trust in government (Al-Rasheed, 2020; Kuwait; COVID-19; Fridman et al., 2020; USA, COVID-19; Min et al., 2020; China, COVID-19; Ning et al., 2020; China; COVID-19; Seale et al., 2020; Australia, COVID-19; Song and Yoo, 2020; South Korea; COVID-19; Ye and Lyu, 2020; China; COVID-19) (4) Agley and Xiao, 2021; USA, …	(3) Mistrust in government (Alonge et al., 2019; Liberia, Ebola; Balami and Meleh, 2019; Nigeria; Ebola; Jang and Baek, 2019; South Korea, MERS) (6) Trust in media: Watching Fox News (Zhao et al., 2020; USA, COVID-19)	(1b) Trust in government (Coroiu et al., 2020; Multiple, COVID-19; Helsingen et al., 2020; Norway and Sweden, COVID-19; Jang et al., 2020; South Korea, MERS)	(1a, 1b, 6) Protective behaviour (2) Protective behaviours and compliance with public health recommendations (3) Unreliable sources of information or misinformation (4) Lower misinformation and conspiracy theories (5) Willigness to provide personal medical information and receive health services (7) Herding behaviour	PRISMA flow diagram and 27-item checklist (not available) No method of risk of bias assessment reported
5	Moran et al. (2021)	COVID-19	29 papers (peer-reviewed, preprints, grey literature; primary reports, studies, empirical studies): 29 COVID-19 Countries: Australia, Canada, Croatia, Germany, Mexico, Multiple (must include Australia, Europe, New Zealand, or North America), Norway, Spain, Switzerland, The Netherlands, United Kingdom, USA	Rapid review (PRISMA-RR) Medline, PubMed, CINAHL, LitCOVID, TRIP PRO, WHO Global research on coronavirus, COVID-19 Primer, National Collaborating Centre for Methods and Tools, medRxiv, bioRxiv, Google and Google Scholar Language: EN Terms (search strategy in supplementary material): COVID-19 (+ other designations), health-risk-behavior-s/risk reduction/social distance, (hand) hygiene, masks, guid…	Not relevant	to summarize factors that impact attitudes toward and adherence to COVID-19 public health guidelines and interventions that improves these attitudes and adherence	(1) Age: (a) Banai et al., 2020; Jørgensen et al., 2020; Pickup et al., 2020; Soest et al., 2020; Underschultz et al., 2020; Zickfeld et al., 2020; (b) Clements, 2020; De Neys et al., 2020; Seale et al., 2020; Yousuf et al., 2020; Zickfeld et al., 2020; (c) Seale et al., 2020; Yousuf et al., 2020; Zickfeld et al., 2020; (d) Clements, 2020 (2) Sex or gender: (a) Allington et al., 2020; Banai et al…		(1) Age: (e) Pickup et al., 2020; Soest et al., 2020; (f) Clements, 2020; (g) Seale et al., 2020; Zickfeld et al., 2020 (2) Sex or gender: (e) Soest et al., 2020; Zickfeld et al., 2020; (f) Clements, 2020; De Neys et al., 2020; Nivette et al., 2020; Seale et al., 2020; Yousuf et al., 2020; (g) Clements, 2020; Seale et al., 2020; Yousuf et al., 2020 (3) Trust or confidence in government or authori…	(1a, 1e, 2a, 2e, 3a, 3e, 4a, 4e, 5a, 5d, 6a, 6d, 7a, 8a, 8d, 9a, 10a, 10f, 11a, 11d, 12a, 12c, 14a, 16a, 17a, 18a, 18c, 21, 22, 23) Overall adherence to public health guidelines (1b, 1f, 2b, 2f, 3b, 3f, 4b, 4f, 5b, 5e, 6b, 7b, 7d, 8b, 8e, 9b, 10b, 11b, 11e, 12b, 12d, 13a, 13c, 14b, 15a, 15c, 16b, 17c, 18b, 18d, 19) Distance and Isolation (1c, 1g, 2c, 3c, 3g, 4d, 4g, 5c, 5f, 6c, 7d, 8c, 9c, 10d, 1…	None No method of risk of bias assessment reported
							Interventions (19a) Moralistic message focussing on duty > virtue (20) Video campaign with a social media influencer + article with infographics Factors (21) Consistent factors: Age (older), sex (woman or female), trust in government, perceived threat of COVID-19. (22) Less frequently mentioned factors: High socio-economic status, trust in science or medicine, access to traditional media sources,…	(23) Belief in conspiracy theories and political conservatism
6	Perski et al. (2022)	Respiratory viruses: influenza, H1N1, COVID-19, SARS, respiratory syncytial virus, parainfluenza, rhinovirus, coronavirus, or adenovirus.	39 papers (peer reviewed; experimental or quasi-experimental): 4 Influenza A (H1N1), 8 Multiple, 9 Influenza, 4 Influenza A or B, 12 Respiratory (viral) infections, 1 COVID-19, 1 SARS Countries: Australia, Bangladesh, China, Costa Rica, Denmark, Finland, France, Germany, Saudi Arabia, Spain, Thailand, The Netherlands, Turkey, United Kingdom, USA	Rapid Evidence Review (APEASE criteria; Michie, Atking, &West, 2014) Medline and Scopus Language: EN Terms: hand hygiene/washing/disinfection/sanitiser or infection control, or mask wearing or facemask or mask or facemasks or face coverings or personal protective equipment, or face touching, or disinfection, or physical distancing or social distancing, or self-inoculation, or hand-to-face contact…	Not relevant	to summarize interventions that improve 6 protective behaviours (hand hygiene, no contact wit the T-zone, droplets control, mask use, disinfection, distanciation) in order to reduce the spread of respiratory viruses.	(1a) Provision of masks with use instructions and sanitizer (Aiello et al., 2010; USA, university students, pandemic influenza A (H1N1); 2012; USA, university students, influenza A or B) (3) Hygiene education and hand sanitizer provided (Apisarnthanarak et al., 2009; Thailand, preschool children, influenza) (4) Hygiene information and mask instructions (Barasheed et al., 2014; Australia/Saudi Ara…	(1b) Provision of masks with use instructions and sanitizer (Aiello et al., 2010; USA, university students, pandemic influenza A (H1N1))	(2) Provision of masks with use instructions (Aiello et al., 2010; USA, university students, pandemic influenza A (H1N1); 2012; USA, university students, influenza A or B) (7) Influenza prevention prescription education (Koep et al., 2016; USA, school children, influenza) (13) Information about hands cleaning and planning task (Reyes Fernández et al., 2015; Costa Rica, university students, respir…	(1a, 8, 10, 14, 15a, 16, 17) Use of Sanitizer (1b, 2, 3, 5, 6, 7, 9, 11, 12, 13, 14, 15a, 15b, 17, 18, 19) Hand washing/hygiene (4, 5) Face mask (14) Cough/Sneeze cover (none) Surface disinfection (none) Physical Distance	PRISMA flow diagram Cochrane's risk-of-bias tool by one reviewer
7	Reda et al. (2025)	COVID-19	51 papers (research study, opinion piece, report; quantitative, qualitative, and mixed-methods): 51 COVID-19 Specific population: Refugees Country: Bangladesh	Scoping Review (PRISMA Sc-R) Databases: Medline, Embase, Global Health, Web of Science Platforms: www.humanitarianresponse.info, reliefweb.int, www.shongjog.org.bd/response/rohingya/ Organisations and other: WHO, UNFPA, UNICEF, UNHCR, GIZ, USAID, Save the Children, UnOCHA, Red Cross, DFID, World Bank, CIDA, JICA, KFW Before June, 2024	Capability-Opportunity-Motivation-Behavior framework and Behavior Change Wheel	to examine the facilitating and hindering factors of protective behaviours among forcibly displaced Myanman nationals or Rohingya refugees in Cox's Bazar, to undersstand how health service providers facilitate these behaviours, and to identify interventions that have been recommended, implemented or tested to address these behaviours.	(1a) Knowledge (5a) Trust in aid agencies, healthcare staff, majees, camp, foreign doctors, Rohingya volunteers, in receiving good quality care, in the vaccine (7) Acceptance of government restrictions (9a) Attitudes towards isolation (willing to isolate when understand why) (11a) Influence of family and friends (12) Social support in isolation (remote communication with family, provision of reli…	(1b) Lack of knowledge (2) Lack of education/literacy skills (3) Message fatigue (4) Memory and poor health challenge (5b) Lack of trust in aid agencies, healthcare staff, majees, camp, in receiving good quality care, in the vaccine (6) Fear, rumors and beliefs (fear of pandemic, religious beliefs, medical beliefs) (8) Risk assessment (9b) Attitudes towards isolation (not willing to be separated …		All factors were related to protective behaviours. When specified, the factors were related to specific protective behaviours considered in this review. (10, 28) Handwashing (6, 13, 15, 27, 28) Social distancing (5a, 5b, 14, 20b, 26, 27, 28) Isolation/quanrantine (6, 10, 15, 20b, 27) Mask wearing (8, 10, 14, 15, 16, 20b, 28) Testing (5a, 5b, 14, 20b, 28) Treatment (5a, 5b, 17, 18, 24a, 24b) Vacci…	PRISMA flow diagram and PRISMA-Sc-R checklist No method of risk of bias reported
8	Seale et al. (2020)	SARS, MERS, H1N1, COVID-19, hypothetical pandemics	53 papers (peer-reviewed; quantitative and qualitative): not reported Countries (not exhaustive, based on those mentioned in the results section): Australia, Canada, China, Hong Kong, Japand, Korea, New Zealand, Taiwan, The Netherlands, USA	Integrative Rapid Narrative review Medline, PubMed, Scopus and Google Scholar Language: EN Terms: social or physical distancing, community mitigation, non-pharmaceutical interventions, community, general public, quarantine, social/university/childcare closure, hygiene, pandemic or epidemic or individual disease names. Screening for the first 10 pages Between January 1, 2000 and March 5, 2020	Behaviour Change Wheel (capability, opportunity, and motivation) and Theoretical Domains Framework	to identify what determines the adherence to protective behaviours (mask, hygiene, respiratory etiquette, isolation and quarantine, school closure) and non-pharmaceutical interventions, and to explore how the strategies act on individuals	(1a) Female, older, highly educated, married, poor self-rated health and/or home duties (Marshal et al., 2009; Cowling et al., 2009; Lau et al., 2007; Lau et al., 2003; Barr et al., 2008; Leung et al., 2004; Tang and Wong, 2004) (2) Perception of susceptibility, severity/fatality, and social pressure (Sim, et al., 2014; Tang et al., 2004; Lau et al., 2010; Tang and Wong, 2005) (4) Awareness of en…	(1b) Male (Lee et al., 2020) (10) Environmental constraints (Scott et al., 2007) (13) Younger adult (Barr et al., 2008) (16) Belief that it is useless, lack of understanding of the reasons and requirements, perception that one's child is not at risk (Bish and Michie, 2008; Uchida, Kaneko, and Kawa, 2014)	(1c) Gender (Barr et al., 2008; Brug et al., 2004) (3) Lack of knowledge about fatality rate (Kuo, et al., 2014)	(1a, 1b, 1c, 2, 3, 4) Mask (5, 6, 7, 8, 9, 10) Hygiene (11) Respiratory etiquette (12, 13, 14, 15) Isolation and quarantine (16, 17) School closure	None No method of risk of bias assessment reported
9	van Mulukom et al. (2022)	COVID-19	31 papers (16 on behavioural change): 31 COVID-19 Countries: Arab Emirates, Australia, Austria, Belgium, Brazil, Canada, China, Croatia, Cyprus, Denmark, Ecuador, England, Finland, France, Germany, Greece, Hong Kong, Iran, Iraq, Ireland, Italy, Jordan, Korea, Kuwait, Mexico, Multiple, New Zealand, Palestine, Philippines, Poland, Portugal, Romania, Russia, Saudi Arabia, Serbia, Slovakia, Spain, Sw…	Systematic review (PRISMA, AMSTAR 2 Checklist) Web of Science (including MEDLINE), Scopus, PsycInfo, PsyArXiv, Google Scholar Language: EN Terms: COVID*(- 19), corona*(virus, SARS-CoV-2, conspir*(acy) Before March 2021	Not relevant	to provide a comprehensive overview of COVID-19 conspiracy beliefs by identifying antecedents and impacts on protective behaviours, and health and social consequence	(4) Conspiracy beliefs (Bai, 2020; USA and United Kingdom; Juanchich et al., 2021; van Mulukom, 2022; Multiple) (5) Conspiracy beliefs and COVID-19 is artifficially created > a hoax (Imhoff and Lamberty, 2020; USA and United Kingdom) (6) Conspiracy beliefs and concerns for food shortages (Jovancevic and Milicevic, 2020; Multiple) (7) Conspiracy beliefs and low income (Juanchich et al., 2021; Unit…	(1) Conspiracy beliefs (a) Allington et al., 2021; United Kingdom; Bierwiaczonek et al., 2020; USA; Constantinou et al., 2021; Cyprus and Greece; Erceg et al., 2020; Croatia; Fountoulakis et al., 2020; Greece; Freeman et al., 2020b; England; Karić and Međedović, 2021; Serbia; Kowalski et al., 2020; Poland; Maftei and Holman, 2022; Romania; Oleksy et al., 2021; Poland; Pavela Banai et al., 2021; C…	(1g) Conspiracy beliefs (Alper et al., 2020; Turkey; Čavojova et al., 2022; Slovakia; Juanchich et al., 2021; United Kingdom)	(1a, 1c, 1g, 2) Hygiene (1a, 1c, 1g, 2) Distancing (1a, 1b, 1g, 2) Mask (3) Adherence to guidelines (4, 5, 6, 7, 8) Hoarding (1d) Pseudo-scientific behaviours (1e, 9) Vaccine (1f) Discrimination and prejudice (e.g., against Asian people, food and restaurants)	PRISMA flow diagram and statement, and AMSTAR 2 statement
10	Winograd et al. (2020)	Influenza, H1N1, HIV/AIDS, Zika, MERS, hepatitis	31 papers (peer reviewed; quantitative, empirical): 2 HBV, 19 HIV/AIDS, 7 Influenza (among which 1 H1N1), 1 MERS, 2 Zika Countries: not reported	Rapid review (GRADE) PsycInfo, Medline, ProQuest Coronavirus Research Database and Cochrane CENTRAL database Language: EN Terms included: illness, viral transmission, communication and health behavior No timeframe but references accessed in August and in October 2020 (accepted in January 2021)	Not relevant	to determine if risk communication reduces the spread of viruses in order to explore which communication approaches are more prone to modify peoples's cognitions and behaviours to reduce the spread of viruses: i) audio/visual communication, ii) intensive multimedia communication, iii) peer health communication or peer health education intervention, iv) established media outlet communication	(1) SMS texts to promote safe sex practices among which condom use (i) Govender et al., 2019; 74,8% truck drivers, HIV) (2a) Three sessions of education and behavioral modeling/rehearsal (i) Horn and Brigham 1996; college students, AIDS) (3a) Seminars on HIV/AIDS (i) Kelly et al., 1994; women, HIV/AIDS) (4) SEPA (HIV risk-reduction intervention for Hispanic woman) + testing/counselling (i) Montan…	(14) Addition of health information on posters to prompt hand washing (i) Davis, Fante, and Jacobi, 2013; university community, influenza)	(2b) Three sessions of education and behavioral modeling/rehearsal (i) Horn and Brigham 1996; college students, AIDS) (3b) Seminars on HIV/AIDS (i) Kelly et al., 1994; women, HIV/AIDS) (8b) Education + HIV testing (ii) Wenger et al., 1992; HIV/AIDS) (11b; location 2 and 3) Trained opinion leader education intervention (iii) Kelly et al., 1992; gay bars customers; HIV/AIDS) (13) Influenza messagin…	(1, 7) Tests (2a, 3a, 4, 6, 7, 8b 9, 10, 12) Female condom use and (12) acceptance (2a) Discussion about and acquisition of condoms (2b, 3b, 8b) Number of partners (3a, 4, 5, 6, 11a, 11b) Protected/safe sex (8a, 10) Sex communication (13) Cough etiquette (13, 14, 15) Hand-washing rates (16a only two weeks after; 16b) Unspecified protective behaviors	PRISMA flow diagram No method of risk of bias assessment reported
11	Zaildo et al. (2023)	COVID-19, pneumonia, tuberculosis, influenza, pertussis, H1N1	71 papers (qualitative and mixed-methods with qualitative analysis): 41 COVID-19, 5 pneumonia, 9 tuberculosis, 19 influenza, 3 pertussis , 2 H1N1 Countries: Australia, Bengladesh, Belgium, Brazil, Canada, China, Democratic Republic of Congo, England, Eritrea, Ethiopia, Germany, Hong Kong, Indonesia, Iran, Ireland, Madagascar, Malawi, Mali, Morocco, Nepal, New Zealand, Nigeria, Northern Ireland, P…	Systematic review (PRISMA, Cochrane Effective Practice and Organisation of Care: Qualitative Evidence Synthesis): Medline, Embase and PsycInfo Language: EN, PT, ES Terms included (no exhaustive): Respiratory Tract Disorders, Coronavirus, Severe Acute Respiratory Syndrome, Tuberculosis, influenza, coronavirus, COVID-19, immunization, social isolation, quanrantine, distance, infection control, dise…	Health Belief Model (risk susceptibility, risk severity, benefits to action, barriers to action, self-efficacy and cues to action) and Behaviour Change Wheel (capability, opportunity and motivation)	to summarize facilitators of and barriers to preventative and control strategies for COVID-19 and respiratory infectious diseases in qualitative research	(3) Financial and social support (5) Knowledge about transmission risks (6) Awareness about outbreaks/disease severity (9) Campaigns, information, media (10) Healthcare professionals guidance (11) Awareness of the advantages of vaccination (12) Quality information (websites, social media, television, religious leaders) (14) Sense of collective responsibility (15) Availability (16) Practicability …	(1) Economic difficulties (2) Financial and food insecurity (4) Lack of knowledge about diseases (7) Fake news (8) Misperceptions about vaccines (13) Indiscipline and low sense of collective responsibility (17) Access barriers (distance, wait, time conflict, low opportunity) (18) Fear of vaccination, injections, pain and side-effects (19) Fear of social stigma (20) Forgetfulness (21) Personal bel…		(1, 2, 3, 4, 5, 6, 12, 14, 17, 19, 20, 21, 22, 23, 26, 28, 30, 31, 32, 34, 35, 41, 42) Prevention and control measure compliance, protective behaviours (2, 3, 16, 24, 38) Treatment (4 ,5, 15, 27, 33) Mask (7, 8, 9, 10, 11, 14, 16, 17, 18, 25, 29, 31, 36, 37, 38, 39, 40) Vaccine (13, 27) Physical distancing (16) Hand hygiene	PRISMA Flow Diagram GRADE-CERQual
Note The factors reported by Moran et al. (2021) in their summary did not include the valence of the impact (i.e., reducing or increasing) on the protective behaviours. Consequently, only the factors reported in the text with a clear valence and non-significant factors were included in this Table. Enabling, blocking and ineffective factors are reported, when available, with the source, the countr…

## Sheet: JBI Critical Appraisal
	Berg et al. (2021)	Brony et al. (2024)	Hall et al. (2022)	Majid et al. (2021)	Moran et al. (2021)	Perski et al. (2022)	Reda et al. (2025)	Seale et al. (2020)	van Mulukom et al. (2022)	Winograd et al. (2020)	Zaildo et al. (2023)
1. Is the review question clearly and explicitly stated?	Yes	Yes	Yes	Yes	Yes	Yes	Yes	Yes	Yes	Yes	Yes
2. Were the inclusion criteria appropriate for the review question?	Yes	Yes	Yes	Yes	Yes	Yes	Yes	Yes	Yes	Yes	Yes
3. Was the search strategy appropriate?	Yes	Yes	Yes	Yes	Yes	Yes	Yes	Unclear	Yes	Yes	Yes
4. Were the sources and resources used to search for studies adequate?	Yes	Yes	Yes	Yes	Yes	Unclear	Yes	Yes	Yes	Yes	Yes
5. Were the criteria for appraising studies appropriate?	No	Yes	Yes	Unclear	No	Yes	Yes	No	Yes	Yes	Yes
6. Was critical appraisal conducted by two or more reviewers independently?	No	Unclear	Yes	Unclear	No	No	Yes	No	Unclear	Yes	Yes
7. Were there methods to minimize errors in data extraction?	Yes	Yes	Yes	Unclear	No	Unclear	Yes	Yes	Yes	Unclear	Yes
8. Were the methods used to combine studies appropriate?	Yes	Yes	Yes	Yes	Yes	Yes	Yes	Yes	Yes	Yes	Yes
9. Was the likelihood of publication bias assessed?	Not applicable	Not applicable	Not applicable	Not applicable	Not applicable	No	Not applicable	Not applicable	Not applicable	Not applicable	Not applicable
10. Were recommendations for policy and/or practice supported by the reported data?	Yes	Yes	Yes	Yes	Yes	Yes	Yes	Yes	Yes	Yes	Yes
11. Were the specific directives for new research appropriate?	Yes	Yes	Yes	Yes	Yes	Yes	Yes	Yes	Yes	Yes	Yes
Total score	8/10	9.5/10	10/10	8,5/10	7/10	8/11 (7,3/10)	10/10	7,5/10	9,5/10	9,5/10	10/10
Note Joanna Briggs Institute Critical Appraisal Checklist for Systematic Reviews and Research Syntheses (Aromataris et al., 2015). Item 9 is made for reviews or meta-analyses with statistical analyses, which was not the case for the studies, except the one by Perski et al. (2022). The total score was computed based on the following rules: Yes = 1 point; No = 0 point; Unclear = 0,5 point; Not appl…
